# Supplementary material
Source: PubMed Central journal article supplement (PMC4766042)
Supplement: NIHMS751756-supplement-supplemental_material.pdf [file NIHMS751756-supplement-supplemental_material.pdf]

## SUPPLEMENTAL MATERIAL

### Herpesvirus Infection and Childhood Stroke

#### DETAILED METHODS:

*Laboratory Assays:* Serological assays for HSV1, HSV2, VZV, CMV, and EBV were performed using enzyme-linked immunosorbent assays (ELISA). For HSV, an IgM assay non-specific to subtype (1 versus 2) was performed first. We used the ELISA assay from Wampole Laboratories (Princeton, NJ) for the first batch, and after this was discontinued, the assay from Diamedix (Miami, FL) for the second batch. Kits were validated with an outside reference laboratory. The relative sensitivity of the assay used was 79% and the specificity 90%. If positive, then an IgG assay for the individual subtypes was performed (Focus Diagnostics, Cypress, CA). Assays against VZV, CMV, and EBV viral capsid antigen were performed following the manufacturer's instructions (Wampole Laboratories, Princeton, NJ). Assays were performed in batches and blinded to both case/control and clinical status. Assays for serologies were validated in the CALM laboratory and were concordant with gold-standard clinical reference lab results spanning the reportable range. The intra- and inter-assay reproducibility coefficients of variation were within the manufacturer specifications.

*Data Analysis:* The definitions for positive acute herpes serologies were established *a priori* according to the manufacturer's instructions and using the algorithms shown in Supplemental Tables 1 and 2. For all patients, an IgM above the manufacturer's threshold was considered positive for *acute* infection (i.e., positive acute serologies). For those with *paired samples*, serological evidence of acute infection required either (1) a fourfold or greater rise in IgG titers from acute to convalescent samples, (2) positive *acute* IgM titer, or (3) positive *convalescent* IgM titer. Because the HSV IgM titer was non-specific for subtype (1 versus 2), IgG titers for HSV 1 and HSV2 were used to make this distinction when possible.

**Supplemental Table 1.** Algorithm for defining positive acute herpes serologies with single (acute) blood samples

|                                      | <b>Serologic definition</b>                                      |
|--------------------------------------|------------------------------------------------------------------|
| <b>Acute HSV</b>                     | HSV1/2 IgM $\geq$ 1.1                                            |
| <b>Acute HSV1</b>                    | HSV1/2 IgM $\geq$ 1.1 AND HSV1 IgG $\geq$ 1.1 AND HSV2 IgG < 1.1 |
| <b>Acute HSV2</b>                    | HSV1/2 IgM $\geq$ 1.1 AND HSV1 IgG < 1.1 AND HSV2 IgG $\geq$ 1.1 |
| <b>Acute HSV 1/2 (indeterminate)</b> | HSV1/2 IgM $\geq$ 1.1 AND (HSV1 IgG < 1.1 AND HSV2 IgG < 1.1)    |
| <b>Acute CMV</b>                     | CMV IgM $\geq$ 1.1                                               |
| <b>Acute EBV</b>                     | EBV VCA IgM $\geq$ 1.1                                           |
| <b>Acute VZV</b>                     | VZV IgM $\geq$ 1.1                                               |

**Supplemental Table 2.** Algorithm for defining positive acute herpes serologies with paired (acute & convalescent) blood samples:

|                                      | <b>Either</b>                                         | <b>or</b>                                                                                                         | <b>or</b>                                                                                                                |
|--------------------------------------|-------------------------------------------------------|-------------------------------------------------------------------------------------------------------------------|--------------------------------------------------------------------------------------------------------------------------|
| <b>Acute HSV</b>                     | Four-fold rise in HSV1 or HSV2 IgG titers (see below) | Acute HSV1/2 IgM $\geq$ 1.1                                                                                       | Convalescent HSV1/2 IgM $\geq$ 1.1                                                                                       |
| <b>Acute HSV 1</b>                   | Convalescent HSV1 IgG $\geq$ 4 X Acute HSV1 IgG       | Acute HSV1/2 IgM $\geq$ 1.1 AND [Acute or Convalescent HSV1 IgG $\geq$ 1.1]                                       | Convalescent HSV1/2 IgM $\geq$ 1.1 AND [Acute or Convalescent HSV1 IgG $\geq$ 1.1]                                       |
| <b>Acute HSV2</b>                    | Convalescent HSV2 IgG $\geq$ 4 X Acute HSV2 IgG       | Acute HSV1/2 IgM $\geq$ 1.1 AND [Acute or Convalescent HSV2 IgG $\geq$ 1.1]                                       | Convalescent HSV1/2 IgM $\geq$ 1.1 AND [Acute or Convalescent HSV2 IgG $\geq$ 1.1]                                       |
| <b>Acute HSV 1/2 (indeterminate)</b> |                                                       | Acute HSV1/2 IgM $\geq$ 1.1 AND [Acute and Convalescent HSV1 IgG <1.1] AND [Acute and Convalescent HSV2 IgG <1.1] | Convalescent HSV1/2 IgM $\geq$ 1.1 AND [Acute and Convalescent HSV1 IgG <1.1] AND [Acute and Convalescent HSV2 IgG <1.1] |
| <b>Acute CMV</b>                     | Convalescent CMV IgG $\geq$ 4 X Acute CMV IgG         | Acute CMV IgM $\geq$ 1.1                                                                                          | Convalescent CMV IgM $\geq$ 1.1                                                                                          |
| <b>Acute EBV</b>                     | Convalescent EBV VCA IgG $\geq$ 4 X Acute EBV VCA IgG | Acute EBV VCA IgM $\geq$ 1.1                                                                                      | Convalescent EBV VCA IgM $\geq$ 1.1                                                                                      |
| <b>Acute VZV</b>                     | Convalescent VZV IgG $\geq$ 4 X Acute VZV IgG         | Acute VZV IgM $\geq$ 1.1                                                                                          | Convalescent VZV IgM $\geq$ 1.1                                                                                          |

**Supplemental Table 3.** Characteristics of VIPS childhood AIS cases with versus without convalescent blood samples

| Characteristic                    | Single Samples<br>N=139 |             | Paired Samples<br>N=187 |             | P-value |
|-----------------------------------|-------------------------|-------------|-------------------------|-------------|---------|
|                                   | n                       | (%)         | n                       | (%)         |         |
| <b>Demographics</b>               |                         |             |                         |             |         |
| Age in years, median (quartiles)  | 7.7                     | (3.1, 14.0) | 7.6                     | (3.1, 14.5) | 0.81    |
| Male gender                       | 79                      | (56.8)      | 107                     | (57.2)      | 0.94    |
| Race/ethnicity                    |                         |             |                         |             | 0.38    |
| White, non-Hispanic               | 92                      | (66.2)      | 120                     | (64.2)      |         |
| Black, non-Hispanic               | 11                      | (7.9)       | 26                      | (13.9)      |         |
| East Asian                        | 3                       | (2.2)       | 4                       | (2.1)       |         |
| Indian/South Asian                | 12                      | (8.6)       | 12                      | (6.4)       |         |
| Middle Eastern                    | 1                       | (0.7)       | 2                       | (1.1)       |         |
| First Nations/Aboriginal          | 0                       | (0.0)       | 3                       | (1.6)       |         |
| Pacific Islander                  | 1                       | (0.7)       | 0                       | (0.0)       |         |
| Mixed or other                    | 18                      | (12.9)      | 16                      | (8.6)       |         |
| Unknown                           | 1                       | (0.7)       | 4                       | (2.1)       |         |
| Ethnicity                         |                         |             |                         |             | 0.007   |
| Non-Hispanic                      | 124                     | (89.2)      | 140                     | (74.9)      |         |
| Hispanic                          | 9                       | (6.5)       | 36                      | (19.3)      |         |
| Mixed or other                    | 6                       | (4.3)       | 11                      | (5.9)       |         |
| Country                           |                         |             |                         |             | 0.0001  |
| USA                               | 75                      | (54.0)      | 130                     | (69.5)      |         |
| Canada                            | 33                      | (23.7)      | 23                      | (12.3)      |         |
| Australia                         | 8                       | (5.8)       | 5                       | (2.7)       |         |
| Philippines                       | 8                       | (5.8)       | 8                       | (4.3)       |         |
| Chile                             | 2                       | (1.4)       | 12                      | (6.4)       |         |
| United Kingdom                    | 9                       | (6.5)       | 1                       | (0.5)       |         |
| France                            | 4                       | (2.9)       | 2                       | (1.1)       |         |
| Serbia                            | 0                       | (0.0)       | 5                       | (2.7)       |         |
| China                             | 0                       | (0.0)       | 1                       | (0.5)       |         |
| <b>Socioeconomic Status</b>       |                         |             |                         |             |         |
| Residence                         |                         |             |                         |             | 0.05    |
| Urban                             | 56                      | (40.3)      | 53                      | (28.3)      |         |
| Suburban                          | 51                      | (36.7)      | 91                      | (48.7)      |         |
| Rural                             | 32                      | (23.0)      | 43                      | (23.0)      |         |
| Household income (in US dollars)  |                         |             |                         |             | 0.10    |
| <\$10,000                         | 14                      | (10.1)      | 39                      | (20.9)      |         |
| \$10,000-30,000                   | 22                      | (15.8)      | 37                      | (19.8)      |         |
| \$31,000-50,000                   | 18                      | (12.9)      | 23                      | (12.3)      |         |
| \$50,000-100,000                  | 42                      | (30.2)      | 44                      | (23.5)      |         |
| >100,000                          | 27                      | (19.4)      | 33                      | (17.6)      |         |
| Missing                           | 16                      | (11.5)      | 11                      | (5.9)       |         |
| Maternal education, highest level |                         |             |                         |             | 0.06    |
| Less than high school             | 9                       | (6.5)       | 32                      | (17.1)      |         |

|                                                                              |           |            |      |
|------------------------------------------------------------------------------|-----------|------------|------|
| High school graduate                                                         | 36 (25.9) | 42 (22.5)  |      |
| Some college education                                                       | 44 (31.7) | 53 (28.3)  |      |
| Bachelor's degree, or equivalent                                             | 31 (22.3) | 29 (15.5)  |      |
| Some graduate education                                                      | 3 (2.2)   | 5 (2.7)    |      |
| Graduate degree                                                              | 10 (7.2)  | 19 (10.2)  |      |
| Missing                                                                      | 6 (4.3)   | 7 (3.7)    |      |
| Number of routine visits to an MD office, past 24 months, median (quartiles) | 2 (1, 4)  | 2 (2, 4.5) | 0.56 |
| <b>Stroke Subtype</b>                                                        |           |            | 0.46 |
| Definite arteriopathy                                                        | 49 (35.3) | 70 (37.4)  |      |
| Arterial dissection                                                          | 11 (7.9)  | 14 (7.5)   |      |
| Transient cerebral arteriopathy                                              | 7 (5.0)   | 16 (8.6)   |      |
| Primary moyamoya                                                             | 7 (5.0)   | 8 (4.3)    |      |
| Secondary moyamoya                                                           | 6 (4.3)   | 10 (5.3)   |      |
| Secondary vasculitis                                                         | 4 (2.9)   | 10 (5.3)   |      |
| Genetic arteriopathy                                                         | 3 (2.2)   | 0 (0.0)    |      |
| PHACES                                                                       | 2 (1.4)   | 0 (0.0)    |      |
| Fibromuscular dysplasia                                                      | 1 (0.7)   | 1 (0.5)    |      |
| Iatrogenic                                                                   | 0 (0.0)   | 1 (0.5)    |      |
| Primary vasculitis                                                           | 0 (0.0)   | 0 (0.0)    |      |
| Not further classified                                                       | 8 (5.8)   | 10 (5.3)   |      |
| Possible arteriopathy                                                        | 16 (11.5) | 14 (7.5)   |      |
| No arteriopathy                                                              | 74 (53.2) | 103 (55.1) |      |
| Cardioembolic                                                                | 25 (18.0) | 46 (24.6)  |      |
| Spontaneous                                                                  | 22 (15.8) | 39 (20.9)  |      |
| Iatrogenic                                                                   | 3 (2.2)   | 7 (3.7)    |      |
| Presumed embolic with hypercoaguable condition                               | 2 (1.4)   | 6 (3.2)    |      |
| Other etiology                                                               | 7 (5.0)   | 10 (5.3)   |      |
| Idiopathic (no known risk factors)                                           | 40 (28.8) | 41 (21.9)  |      |

---

**Supplemental Table 4.** Evidence of past herpesvirus infection (positive IgG and negative IgM antibody titers) in childhood AIS cases\* versus stroke-free trauma controls enrolled in USA, Canada, and Chile only (N=389)

| Herpes Virus     | Cases<br>N=275 |        | Controls<br>N=114 |        | OR†  | 95% CI       | P-value |
|------------------|----------------|--------|-------------------|--------|------|--------------|---------|
|                  | n              | (%)    | n                 | (%)    |      |              |         |
| HSV1 or 2        | 49             | (17.8) | 23                | (20.2) | 0.90 | (0.52, 1.59) | 0.70    |
| VZV              | 162            | (58.9) | 67                | (58.8) | 1.05 | (0.67, 1.64) | 0.84    |
| CMV              | 77             | (28.0) | 41                | (36.0) | 0.71 | (0.45, 1.14) | 0.15    |
| EBV              | 148            | (53.8) | 57                | (50.0) | 1.26 | (0.81, 1.98) | 0.31    |
| Any herpes virus | 220            | (80.0) | 96                | (84.2) | 0.84 | (0.45, 1.50) | 0.56    |

\*Analysis based on acute blood samples only to allow case/control comparison

† Odds ratio (OR) adjusted for age

**Supplemental Table 5.** Clinical and stroke characteristics among cases of childhood AIS stratified by serologic evidence of acute herpesvirus exposure (gold standard algorithm using paired samples, N=187)

|                                     | Acute herpesvirus exposure |             |                  |             | p-value |
|-------------------------------------|----------------------------|-------------|------------------|-------------|---------|
|                                     | Positive (N=85)            |             | Negative (N=102) |             |         |
|                                     | n                          | (%)         | n                | (%)         |         |
| <b>Demographics</b>                 |                            |             |                  |             |         |
| Age in years, median (quartiles)    | 9.6                        | (4.4, 14.8) | 7.0              | (1.6, 13.9) | 0.07    |
| Male gender                         | 40                         | (47.1)      | 67               | (65.7)      | 0.01    |
| Race                                |                            |             |                  |             | 0.24*   |
| White                               | 49                         | (57.6)      | 71               | (69.6)      |         |
| Black                               | 12                         | (14.1)      | 14               | (13.7)      |         |
| Indian/South Asian                  | 2                          | (2.4)       | 2                | (2.0)       |         |
| East Asian                          | 8                          | (9.4)       | 4                | (3.9)       |         |
| First Nations/Aboriginal            | 1                          | (1.2)       | 1                | (1.0)       |         |
| Middle Eastern                      | 2                          | (2.4)       | 1                | (1.0)       |         |
| Pacific Islander                    | 0                          | (0.0)       | 0                | (0.0)       |         |
| Mixed or other                      | 4                          | (4.7)       | 0                | (0.0)       |         |
| Unknown                             | 7                          | (8.2)       | 9                | (8.8)       |         |
| Ethnicity                           |                            |             |                  |             | 0.56*   |
| Non-Hispanic                        | 64                         | (75.3)      | 76               | (74.5)      |         |
| Hispanic                            | 14                         | (16.5)      | 22               | (21.6)      |         |
| Mixed or other                      | 7                          | (8.2)       | 4                | (3.9)       |         |
| Country                             |                            |             |                  |             | 0.009*  |
| USA                                 | 51                         | (60.0)      | 79               | (77.5)      |         |
| Canada                              | 11                         | (12.9)      | 12               | (11.8)      |         |
| Australia                           | 4                          | (4.7)       | 1                | (1.0)       |         |
| Philippines                         | 7                          | (8.2)       | 1                | (1.0)       |         |
| Chile                               | 4                          | (4.7)       | 8                | (7.8)       |         |
| United Kingdom                      | 0                          | (0.0)       | 1                | (1.0)       |         |
| France                              | 2                          | (2.4)       | 0                | (0.0)       |         |
| Serbia                              | 4                          | (4.7)       | 1                | (1.0)       |         |
| China                               | 1                          | (1.2)       | 0                | (0.0)       |         |
| <b>Parental report of infection</b> |                            |             |                  |             |         |
| Any clinical infection in the...    |                            |             |                  |             |         |
| Prior week                          | 15                         | (17.6)      | 20               | (19.6)      | 0.85    |
| Prior month                         | 36                         | (42.4)      | 42               | (41.2)      | 0.76    |
| Prior 6 months                      | 49                         | (57.6)      | 54               | (52.9)      | 0.57    |
| Clinical infection in prior week    |                            |             |                  |             |         |
| Type of illness                     |                            |             |                  |             |         |
| Cold/upper respiratory infection    | 4                          | (4.7)       | 9                | (8.8)       | 0.39*   |
| Stomach flu/gastroenteritis         | 2                          | (2.4)       | 3                | (2.9)       | 1.00*   |
| Ear infection/otitis media          | 4                          | (4.7)       | 2                | (2.0)       | 0.41*   |
| Pneumonia                           | 2                          | (2.4)       | 2                | (2.0)       | 1.00*   |

|                                                              |     |         |    |         |       |
|--------------------------------------------------------------|-----|---------|----|---------|-------|
| Flu/influenza                                                | 0   | (0.0)   | 1  | (1.0)   | 1.00* |
| Chicken pox                                                  | 0   | (0.0)   | 0  | (0.0)   | n/a   |
| Roseola                                                      | 0   | (0.0)   | 0  | (0.0)   | n/a   |
| Taken to a doctor for the illness                            | 12  | (14.1)  | 18 | (17.6)  | 0.51  |
| Treated with antibiotics for the illness                     | 11  | (12.9)  | 12 | (11.8)  | 0.81  |
| Admitted to the hospital for the illness                     | 6   | (7.1)   | 13 | (12.7)  | 0.2   |
| Missed school for the illness                                | 8   | (9.4)   | 6  | (5.9)   | 0.36  |
| Associated signs/symptoms                                    |     |         |    |         |       |
| Cough                                                        | 7   | (8.2)   | 10 | (9.8)   | 0.71  |
| Fever (temperature >101 F or 38.5 C)                         | 9   | (10.6)  | 11 | (10.8)  | 0.97  |
| Runny nose                                                   | 4   | (4.7)   | 7  | (6.9)   | 0.76* |
| Vomiting                                                     | 3   | (3.5)   | 10 | (9.8)   | 0.35* |
| Sore throat                                                  | 3   | (3.5)   | 4  | (3.9)   | 1.00* |
| Diarrhea                                                     | 2   | (2.4)   | 2  | (2.0)   | 1.00* |
| Ear pain                                                     | 2   | (2.4)   | 1  | (1.0)   | 0.59* |
| Rash                                                         | 0   | (0.0)   | 2  | (2.0)   | 0.50* |
| Ulcers in mouth                                              | 0   | (0.0)   | 1  | (1.0)   | 1.00* |
| Urinary frequency                                            | 0   | (0.0)   | 0  | (0.0)   | n/a   |
| Pain with urination                                          | 0   | (0.0)   | 0  | (0.0)   | n/a   |
| Ulcers on hands/feet                                         | 0   | (0.0)   | 0  | (0.0)   | n/a   |
| Total infectious illnesses, median (range)                   | 1   | (0, 2)  | 1  | (0, 2)  | 0.99  |
| Total days of illness, median (range)                        | 3   | (0, 10) | 4  | (1, 10) | 0.93  |
| Number of physician visits for illness, median (range)       | 0.5 | (0, 1)  | 1  | (0, 1)  | 0.77  |
| Total school/daycare days missed for illness, median (range) | 0   | (0, 2)  | 0  | (0, 3)  | 0.68  |
| Prior varicella vaccination (ever)                           | 49  | (57.6)  | 67 | (65.7)  | 0.34  |
| <b>Stroke Subtype</b>                                        |     |         |    |         | 0.76  |
| Definite arteriopathy                                        | 36  | (42.4)  | 34 | (33.3)  |       |
| Arterial dissection                                          | 9   | (10.6)  | 5  | (4.9)   |       |
| Transient cerebral arteriopathy                              | 9   | (10.6)  | 7  | (6.9)   |       |
| Primary moyamoya                                             | 2   | (2.4)   | 6  | (5.9)   |       |
| Secondary moyamoya                                           | 6   | (7.1)   | 4  | (3.9)   |       |
| Secondary vasculitis                                         | 6   | (7.1)   | 4  | (3.9)   |       |
| Genetic arteriopathy                                         | 0   | (0.0)   | 0  | (0.0)   |       |
| PHACES                                                       | 0   | (0.0)   | 0  | (0.0)   |       |
| Fibromuscular dysplasia                                      | 0   | (0.0)   | 1  | (1.0)   |       |
| Iatrogenic                                                   | 0   | (0.0)   | 1  | (1.0)   |       |
| Primary vasculitis                                           | 0   | (0.0)   | 0  | (0.0)   |       |
| Not further classified                                       | 4   | (4.7)   | 6  | (5.9)   |       |
| Possible arteriopathy                                        | 5   | (5.9)   | 9  | (8.8)   |       |
| No arteriopathy                                              | 44  | (51.8)  | 59 | (57.8)  |       |
| Cardioembolic                                                | 19  | (22.4)  | 27 | (26.5)  |       |
| Spontaneous                                                  | 17  | (20.0)  | 22 | (21.6)  |       |
| Iatrogenic                                                   | 2   | (2.4)   | 5  | (4.9)   |       |
| Presumed embolic with prothrombotic                          | 2   | (2.4)   | 4  | (3.9)   |       |

|                                                                 |      |             |      |             |       |
|-----------------------------------------------------------------|------|-------------|------|-------------|-------|
| condition                                                       |      |             |      |             |       |
| Other etiology                                                  | 4†   | (4.7)       | 6‡   | (5.9)       |       |
| Idiopathic (no known risk factors)                              | 19   | (22.4)      | 22   | (21.6)      |       |
| Isolated patent foramen ovale (PFO)                             | 4    | (4.7)       | 1    | (1.0)       |       |
| Migraine                                                        | 1    | (1.2)       | 1    | (1.0)       |       |
| No PFO or migraine                                              | 14   | (16.5)      | 20   | (19.6)      |       |
| <b>Stroke presentation</b>                                      |      |             |      |             |       |
| Focal signs                                                     |      |             |      |             |       |
| Hemiparesis                                                     | 69   | (81.2)      | 79   | (77.5)      | 0.87  |
| Dysarthria                                                      | 25   | (29.4)      | 29   | (28.4)      | 0.17  |
| Aphasia                                                         | 22   | (25.9)      | 17   | (16.7)      | 0.09  |
| Ataxia                                                          | 22   | (25.9)      | 18   | (17.6)      | 0.39  |
| Visual field deficit                                            | 8    | (9.4)       | 14   | (13.7)      | 0.59  |
| Non-focal signs                                                 |      |             |      |             |       |
| Headache                                                        | 37   | (43.5)      | 28   | (27.5)      | 0.06  |
| Decreased level of consciousness                                | 31   | (36.5)      | 23   | (22.5)      | 0.10  |
| Nausea/vomiting                                                 | 20   | (23.5)      | 22   | (21.6)      | 0.72  |
| Seizures at presentation                                        | 20   | (23.5)      | 32   | (31.4)      | 0.42  |
| Vertigo                                                         | 9    | (10.6)      | 14   | (13.7)      | 0.59  |
| Diplopia                                                        | 4    | (4.7)       | 6    | (5.9)       | 0.97* |
| Papilledema                                                     | 0    | (0.0)       | 1    | (1.0)       | 0.78* |
| <b>Infarct Characteristics at Baseline</b>                      |      |             |      |             |       |
| Location                                                        |      |             |      |             |       |
| Vascular distribution of infarction                             |      |             |      |             |       |
| Superficial MCA                                                 | 49   | (57.6)      | 58   | (56.9)      | 0.91  |
| Lenticulostriate                                                | 32   | (37.6)      | 36   | (35.3)      | 0.74  |
| PCA                                                             | 13   | (15.3)      | 17   | (16.7)      | 0.80  |
| PICA                                                            | 12   | (14.1)      | 7    | (6.9)       | 0.10  |
| ACA                                                             | 3    | (3.5)       | 12   | (11.8)      | 0.06* |
| SCA                                                             | 8    | (9.4)       | 5    | (4.9)       | 0.23  |
| Anterior choroidal                                              | 6    | (7.1)       | 9    | (8.8)       | 0.66  |
| Basilar                                                         | 8    | (9.4)       | 8    | (7.8)       | 0.70  |
| AICA                                                            | 0    | (0.0)       | 2    | (2.0)       | 0.50* |
| Other                                                           | 3    | (3.5)       | 3    | (2.9)       | 1.00* |
| Infarct side                                                    |      |             |      |             | 0.95  |
| Left                                                            | 26   | (30.6)      | 32   | (31.4)      |       |
| Right                                                           | 36   | (42.4)      | 43   | (42.2)      |       |
| Bilateral                                                       | 23   | (27.1)      | 25   | (24.5)      |       |
| Volume of largest infarct, cm <sup>3</sup> , median (quartiles) | 14.9 | (3.7, 66.6) | 16.8 | (2.7, 76.5) | 0.91  |

† sickle cell (n=1), meningitis (n=1), genetic syndrome (n=2)

‡ sickle cell (n=2), head trauma (n=1), meningitis (n=1), cancer (n=1), genetic syndrome (n=1)

\*Fisher's exact (all others were chi-square, except Wilcoxon rank sum for continuous variables)
